# Supplementary material for: Novel insights into multitargeted potential of N′-(4-benzylpiperidin-1-yl)alkylamine derivatives in the management of Alzheimer's disease associated pathogenesis
Source: Royal Society of Chemistry journal article supplement (doi:10.1039/c6ra24017h), 2016-01-01
Supplement: c6ra24017h1.pdf [file c6ra24017h1.pdf]

## Supporting information

### *Novel Insights into Multitargeted Potential of N'-(4-benzylpiperidin-1-yl)alkylamine derivatives in the Management of Alzheimer's Disease Associated Pathogenesis*

Poonam Meena<sup>a</sup>, Apra Manral<sup>a</sup>, Vishal Nemaysh<sup>b</sup>, Vikas Saini<sup>a</sup>, Fouzia Siraj<sup>c</sup>, Pratibha Mehta Luthra<sup>b</sup>, Manisha Tiwari<sup>a\*</sup>

**Table S1.**

Body weight (g) for male Wistar rats after 21 days of treatment with test compounds 5h and 5k by intraperitoneal route.

| Days | Control (saline) |            | Compound 5h (5mg/kg) |            | Compound 5k (5mg/kg) |            |
|------|------------------|------------|----------------------|------------|----------------------|------------|
|      | Bwt (g)          | % Increase | Bwt (g)              | % Increase | Bwt (g)              | % Increase |
| 0    | 275.42 ± 6.91    | -          | 270.63 ± 4.55        | -          | 274.87 ± 5.92        | -          |
| 10   | 283.91 ± 5.42    | 3.08       | 281.86 ± 5.08        | 4.15       | 285.33 ± 4.71        | 3.8        |
| 20   | 294.46 ± 4.83    | 6.91       | 293.35 ± 5.61        | 8.39       | 295.14 ± 5.29        | 7.37       |

The values are expressed as mean ± SEM (n = 8 animals per group).

**Table S2.**

Effect of test compounds 5h and 5k on serum biochemical parameters in Wistar rats treated for 21 consecutive days intraperitoneally.

| Serum<br>Biochemical<br>Parameters | Groups           |                      |                      |
|------------------------------------|------------------|----------------------|----------------------|
|                                    | Control (saline) | Compound 5h (5mg/kg) | Compound 5k (5mg/kg) |
| AST (U/L)                          | 149.12 ± 5.68    | 147.43 ± 4.68        | 151.38 ± 4.29        |
| ALP (U/L)                          | 121.05 ± 12.30   | 123.95 ± 8.31        | 124.05 ± 7.43        |
| Creatinine (mg/dL)                 | 0.59 ± 0.89      | 0.50 ± 0.48          | 0.55 ± 0.26          |
| BUN (mg/dL)                        | 10.54 ± 1.15     | 9.94 ± 1.55          | 11.94 ± 1.49         |

The values are expressed as mean ± SEM (n = 8 animals per group)

**AST**: aspartate aminotransferase, **ALP**: alkaline phosphatase, **BUN**: blood urea nitrogen.
